# Supplementary material for: Factors affecting the implementation of calcium supplementation strategies during pregnancy to prevent pre-eclampsia: a mixed-methods systematic review
Source: PubMed Central journal article supplement (PMC10749021; doi:10.1136/bmjopen-2022-070677), 2023-12-22
Supplement: bmjopen-2022-070677supp005.pdf [file bmjopen-2022-070677supp005.pdf]

## Appendix 4. Critical Appraisal Table

### Qualitative studies

| STUDY<br>DETAIL | SCREENING QUESTIONS                     |                                                                    | 1. QUALITATIVE STUDIES                                                                                                         |                                                                                                                            |                                                                             |                                                                                                        |                                                                                                                                          |                                                                                                     |                                                                                                                                                                      | MMAT RATING                                              |
|-----------------|-----------------------------------------|--------------------------------------------------------------------|--------------------------------------------------------------------------------------------------------------------------------|----------------------------------------------------------------------------------------------------------------------------|-----------------------------------------------------------------------------|--------------------------------------------------------------------------------------------------------|------------------------------------------------------------------------------------------------------------------------------------------|-----------------------------------------------------------------------------------------------------|----------------------------------------------------------------------------------------------------------------------------------------------------------------------|----------------------------------------------------------|
|                 |                                         |                                                                    | 1.1. Is the qualitative approach appropriate to answer the research question? (Aim, appropriateness of a qualitative approach) | 1.2. Are the qualitative data collection methods adequate to address the research question? (recruitment, data collection) | 1.3. Are the findings adequately derived from the data? (rigor in analysis) | 1.4. Is the interpretation of results sufficiently substantiated by data? (link from data to findings) | 1.5. Is there coherence between qualitative data sources, collection, analysis and interpretation? (overall design from start to finish) | 1.6. Have ethical issues been taken into consideration? (consent, confidentiality, ethics approval) | 1.7. Is relationship between researcher and participants adequately considered? (interaction and reflection on how research team influences design & implementation) |                                                          |
| First author    | S1. Are there clear research questions? | S2. Do the collected data allow to address the research questions? | 1.1. Is the qualitative approach appropriate to answer the research question? (Aim, appropriateness of a qualitative approach) | 1.2. Are the qualitative data collection methods adequate to address the research question? (recruitment, data collection) | 1.3. Are the findings adequately derived from the data? (rigor in analysis) | 1.4. Is the interpretation of results sufficiently substantiated by data? (link from data to findings) | 1.5. Is there coherence between qualitative data sources, collection, analysis and interpretation? (overall design from start to finish) | 1.6. Have ethical issues been taken into consideration? (consent, confidentiality, ethics approval) | 1.7. Is relationship between researcher and participants adequately considered? (interaction and reflection on how research team influences design & implementation) | MMAT RATING                                              |
| Vestering 2019  | Yes                                     | Yes                                                                | Yes                                                                                                                            | Yes                                                                                                                        | Yes                                                                         | Yes                                                                                                    | Yes                                                                                                                                      | Partial                                                                                             | Partial                                                                                                                                                              | "Moderate" (minor issues impacting credibility/validity) |
| Birhanu 2018    | Yes                                     | Yes                                                                | Yes                                                                                                                            | Yes                                                                                                                        | Yes                                                                         | Yes                                                                                                    | Yes                                                                                                                                      | Yes                                                                                                 | Unclear                                                                                                                                                              | "Moderate" (minor issues impacting credibility/validity) |
| Martin 2017a    | Yes                                     | Yes                                                                | Yes                                                                                                                            | Yes                                                                                                                        | Yes                                                                         | Yes                                                                                                    | Yes                                                                                                                                      | Yes                                                                                                 | Unclear                                                                                                                                                              | "Moderate" (minor issues impacting credibility/validity) |
| Martin 2018     | Yes                                     | Yes                                                                | Yes                                                                                                                            | Yes                                                                                                                        | Yes                                                                         | Yes                                                                                                    | Yes                                                                                                                                      | Yes                                                                                                 | Partial                                                                                                                                                              | "Moderate" (minor issues impacting credibility/validity) |

## Quantitative studies

| STUDY<br>DETAIL              | SCREENING QUESTIONS                     |                                                                    | 3. NON-RANDOMIZED STUDIES                                          |                                                                                              |                                       |                                                                    |                                                                                                    | 4. QUANTITATIVE DESCRIPTIVE STUDIES                                      |                                                             |                                        |                                           |                                                                               | MMAT RATING                                               |
|------------------------------|-----------------------------------------|--------------------------------------------------------------------|--------------------------------------------------------------------|----------------------------------------------------------------------------------------------|---------------------------------------|--------------------------------------------------------------------|----------------------------------------------------------------------------------------------------|--------------------------------------------------------------------------|-------------------------------------------------------------|----------------------------------------|-------------------------------------------|-------------------------------------------------------------------------------|-----------------------------------------------------------|
|                              | S1. Are there clear research questions? | S2. Do the collected data allow to address the research questions? | 3.1. Are the participants representative of the target population? | 3.2. Are measurements appropriate regarding both the outcome and intervention (or exposure)? | 3.3. Are there complete outcome data? | 3.4. Are the confounders accounted for in the design and analysis? | 3.5. During the study period, is the intervention administered (or exposure occurred) as intended? | 4.1. Is the sampling strategy relevant to address the research question? | 4.2. Is the sample representative of the target population? | 4.3. Are the measurements appropriate? | 4.4. Is the risk of nonresponse bias low? | 4.5. Is the statistical analysis appropriate to answer the research question? |                                                           |
| Baxter 2014                  | Yes                                     | Yes                                                                |                                                                    |                                                                                              |                                       |                                                                    |                                                                                                    | Yes                                                                      | Unclear                                                     | Yes                                    | No                                        | Yes                                                                           | "Low" (some issues likely to impact credibility/validity) |
| Thapa 2016                   | Yes                                     | Yes                                                                | Yes                                                                | Yes                                                                                          | Yes                                   | Yes                                                                | Yes                                                                                                |                                                                          |                                                             |                                        |                                           |                                                                               | "High" (no or very minor significant issues)              |
| Nguyen 2019                  | Yes                                     | Yes                                                                |                                                                    |                                                                                              |                                       |                                                                    |                                                                                                    | Yes                                                                      | Yes                                                         | Yes                                    | Unclear                                   | Yes                                                                           | "Moderate" (minor issues impacting credibility/validity)  |
| Omotayo 2018a & Martin 2017b | Yes                                     | Yes                                                                | Yes                                                                | Yes                                                                                          | Partial                               | Yes                                                                | Yes                                                                                                |                                                                          |                                                             |                                        |                                           |                                                                               | "Moderate" (minor issues impacting credibility/validity)  |
| Nguyen 2017                  | Yes                                     | Yes                                                                |                                                                    |                                                                                              |                                       |                                                                    |                                                                                                    | Yes                                                                      | Yes                                                         | Yes                                    | Yes                                       | Yes                                                                           | "High" (no or very minor significant issues)              |
| Nguyen 2018                  | Yes                                     | Yes                                                                |                                                                    |                                                                                              |                                       |                                                                    |                                                                                                    | Yes                                                                      | Yes                                                         | Yes                                    | Yes                                       | Yes                                                                           | "High" (no or very minor significant issues)              |

|                      |     |     |  |  |  |  |  |         |         |         |     |         |                                                                |
|----------------------|-----|-----|--|--|--|--|--|---------|---------|---------|-----|---------|----------------------------------------------------------------|
| Liu 2019             | Yes | Yes |  |  |  |  |  | Yes     | Yes     | Partial | No  | Yes     | "Low" (some issues likely to impact credibility/validity)      |
| Shakya Shrestha 2020 | Yes | Yes |  |  |  |  |  | Partial | Unclear | Partial | Yes | Partial | "Very low" (significant issues impacting credibility/validity) |
| Ghosh-Jerath 2015    | Yes | Yes |  |  |  |  |  | Yes     | Yes     | Partial | No  | Yes     | "Low" (some issues likely to impact credibility/validity)      |

\*Grey shades or empty cells refer to not applicable.

### Mixed methods studies

| STUDY DETAIL           | First author                                                                                                                                                         | Omotayo 2018b & Martin 2017c | Kachwaha 2022 |
|------------------------|----------------------------------------------------------------------------------------------------------------------------------------------------------------------|------------------------------|---------------|
| SCREENING QUESTIONS    | S1. Are there clear research questions?                                                                                                                              | Yes                          | Yes           |
|                        | S2. Do the collected data allow to address the research questions?                                                                                                   | Yes                          | Yes           |
| 1. QUALITATIVE STUDIES | 1.1. Is the qualitative approach appropriate to answer the research question? (Aim, appropriateness of a qualitative approach)                                       | Yes                          | Yes           |
|                        | 1.2. Are the qualitative data collection methods adequate to address the research question? (recruitment, data collection)                                           | Yes                          | Yes           |
|                        | 1.3. Are the findings adequately derived from the data? (rigor in analysis)                                                                                          | Yes                          | Yes           |
|                        | 1.4. Is the interpretation of results sufficiently substantiated by data? (link from data to findings)                                                               | Yes                          | Yes           |
|                        | 1.5. Is there coherence between qualitative data sources, collection, analysis and interpretation? (overall design from start to finish)                             | Yes                          | Yes           |
|                        | 1.6. Have ethical issues been taken into consideration? (consent, confidentiality, ethics approval)                                                                  | Yes                          | Yes           |
|                        | 1.7. Is relationship between researcher and participants adequately considered? (interaction and reflection on how research team influences design & implementation) | Unclear                      | Unclear       |
|                        | 4.1. Is the sampling strategy relevant to address the research question?                                                                                             | Yes                          | Yes           |

|                                            |                                                                                                                                |                                              |                                                          |
|--------------------------------------------|--------------------------------------------------------------------------------------------------------------------------------|----------------------------------------------|----------------------------------------------------------|
| <b>4. QUANTITATIVE DESCRIPTIVE STUDIES</b> | <b>4.2. Is the sample representative of the target population?</b>                                                             | Yes                                          | Yes                                                      |
|                                            | <b>4.3. Are the measurements appropriate?</b>                                                                                  | Yes                                          | Yes                                                      |
|                                            | <b>4.4. Is the risk of nonresponse bias low?</b>                                                                               | Yes                                          | Partial                                                  |
|                                            | <b>4.5. Is the statistical analysis appropriate to answer the research question?</b>                                           | Yes                                          | Yes                                                      |
| <b>5. MIXED METHODS STUDIES</b>            | <b>5.1. Is there an adequate rationale for using a mixed methods design to address the research question?</b>                  | Yes                                          | Yes                                                      |
|                                            | <b>5.2. Are the different components of the study effectively integrated to answer the research question?</b>                  | Yes                                          | Yes                                                      |
|                                            | <b>5.3. Are the outputs of the integration of qualitative and quantitative components adequately interpreted?</b>              | Yes                                          | Yes                                                      |
|                                            | <b>5.4. Are divergences and inconsistencies between quantitative and qualitative results adequately addressed?</b>             | Yes                                          | Yes                                                      |
|                                            | <b>5.5. Do the different components of the study adhere to the quality criteria of each tradition of the methods involved?</b> | Yes                                          | Partial                                                  |
| <b>MMAT RATING</b>                         |                                                                                                                                | "High" (no or very minor significant issues) | "Moderate" (minor issues impacting credibility/validity) |
