# Supplementary material for: Factors affecting the implementation of calcium supplementation strategies during pregnancy to prevent pre-eclampsia: a mixed-methods systematic review
Source: PubMed Central journal article supplement (PMC10749021; doi:10.1136/bmjopen-2022-070677), 2023-12-22
Supplement: bmjopen-2022-070677supp007.pdf [file bmjopen-2022-070677supp007.pdf]

## Appendix 7. COM-B Mapping Table

| Behavior aimed: calcium supplementation use by women and health providers |              |             |                                                                                                          |                                                          |                                            |                                         |
|---------------------------------------------------------------------------|--------------|-------------|----------------------------------------------------------------------------------------------------------|----------------------------------------------------------|--------------------------------------------|-----------------------------------------|
| No                                                                        | COM-B Domain | TDF Domain* | List of factors affecting calcium use                                                                    | Stakeholders affected (women, health providers, partner) | Evidence Source (Quantitative/Qualitative) | Barriers or facilitators to calcium use |
| <b>Women's factors</b>                                                    |              |             |                                                                                                          |                                                          |                                            |                                         |
| 1                                                                         | Capability   | Know        | Limited knowledge about preeclampsia/eclampsia                                                           | Women                                                    | Qualitative                                |                                         |
| 2                                                                         | Capability   | Know        | Counselling on information about preeclampsia and calcium from their providers independent to woman risk | Women                                                    | Qualitative                                |                                         |
| 3                                                                         | Capability   | Know        | High knowledge of calcium supplementation                                                                | Women                                                    | Quantitative                               |                                         |
| 4                                                                         | Capability   | Know        | High education of women                                                                                  | Women                                                    | Quantitative                               |                                         |
| 5                                                                         | Capability   | Know        | Symptoms were believed to be linked to evil attacks or nutritional deficiencies                          | Women                                                    | Qualitative                                |                                         |
| 6                                                                         | Capability   | Know        | Inadequate information on preeclampsia/eclampsia and calcium from providers                              | Women                                                    | Qualitative                                |                                         |
| 7                                                                         | Capability   | Know        | Receive adequate information about condition and calcium from their providers                            | Women                                                    | Qualitative                                |                                         |
| 8                                                                         | Motivation   | Bel Cons    | Preeclampsia/eclampsia was not considered as a serious problem by women                                  | Women                                                    | Qualitative                                |                                         |
| 9                                                                         | Motivation   | Bel Cons    | Experiences and fears of side effects                                                                    | Women                                                    | Qualitative and quantitative               |                                         |
| 10                                                                        | Motivation   | Bel Cons    | Assurance of calcium safety                                                                              | Women                                                    | Qualitative                                |                                         |
| 11                                                                        | Motivation   | Bel Cons    | Safety of calcium was not assured                                                                        | Women                                                    | Qualitative                                |                                         |
| 12                                                                        | Motivation   | Bel Cons    | Experienced and expected benefits from taking calcium and folic acid                                     | Women                                                    | Qualitative and quantitative               |                                         |
| 13                                                                        | Motivation   | Bel Cap     | Belief that having essential information would help them making informed decisions                       | Women                                                    | Qualitative                                |                                         |
| 14                                                                        | Motivation   | Bel Cap     | Belief that providers is a reliable source of information                                                | Women                                                    | Qualitative                                |                                         |
| 15                                                                        | Motivation   | Bel Cap     | Belief of being able to consume calcium daily                                                            | Women                                                    | Quantitative                               |                                         |
| 16                                                                        | Motivation   | Em          | Valued information, education and communication (IEC) materials                                          | Women                                                    | Qualitative                                |                                         |
| 17                                                                        | Motivation   | Em          | Positive perceptions on calcium tablet characteristics (e.g. size, taste, smell)                         | Women                                                    | Qualitative and quantitative               |                                         |
| 18                                                                        | Motivation   | Em          | Women felt that 3-4 pills per day at multiple times were too many                                        | Women                                                    | Quantitative and qualitative               |                                         |
| 19                                                                        | Motivation   | Em          | Inconvenience in taking pill daily                                                                       | Women                                                    | Quantitative and qualitative               |                                         |
| 20                                                                        | Motivation   | Em          | Belief that one combined pill per day could ease burden                                                  | Women                                                    | Qualitative                                |                                         |
| 21                                                                        | Motivation   | Em          | Feeling confident taking calcium after receiving adequate information from provider                      | Women                                                    | Quantitative                               |                                         |
| 22                                                                        | Opportunity  | Soc         | Discouragement by family, neighbours and community in taking calcium                                     | Women                                                    | Qualitative and quantitative               |                                         |

|                          |             |          |                                                                                     |                     |                              |              |
|--------------------------|-------------|----------|-------------------------------------------------------------------------------------|---------------------|------------------------------|--------------|
| 23                       | Opportunity | Soc      | Stigmatisation of having supplements and posters with HIV                           | Women               | Qualitative                  | Barriers     |
| 24                       | Opportunity | Soc      | Family support in consuming calcium                                                 | Women               | Qualitative and quantitative | Facilitators |
| 25                       | Opportunity | Soc      | Positive belief and experiences about 'adherence partners'                          | Women               | Qualitative and quantitative | Facilitators |
| 26                       | Opportunity | Ev       | Conflicting daily routine with taking calcium                                       | Women               | Qualitative and quantitative | Barriers     |
| 27                       | Opportunity | Ev       | Food insecurity                                                                     | Women               | Qualitative and quantitative | Barriers     |
| 28                       | Opportunity | Ev       | Early initiation and frequent antenatal visits                                      | Women               | Quantitative                 | Facilitators |
| 29                       | Opportunity | Ev       | Receiving free calcium supplements                                                  | Women               | Quantitative                 | Facilitators |
| 30                       | Opportunity | Ev       | Reminder tools distribution, such as home based posters and pill-taking calendars   | Women               | Qualitative and Quantitative | Facilitators |
| 31                       | Opportunity | Ev       | Universal free calcium distribution through antenatal care                          | Women               | Quantitative                 | Facilitators |
| <b>Providers factors</b> |             |          |                                                                                     |                     |                              |              |
| 1                        | Capability  | Know     | Varied knowledge on pre-eclampsia/eclampsia                                         | Providers           | Qualitative                  | Barriers     |
| 3                        | Capability  | Skills   | Incontinuity and non-in-depth training about pre-eclampsia/eclampsia                | Providers           | Qualitative                  | Barriers     |
| 2                        | Capability  | Skills   | Felt inadequately trained                                                           | Providers           | Qualitative                  | Barriers     |
| 4                        | Capability  | Skills   | Continuous training to manage the condition and address resistance from community   | Providers           | Qualitative                  | Facilitators |
| 5                        | Motivation  | Bel Cons | Positive belief about calcium supplementation benefits                              | Providers           | Qualitative                  | Facilitators |
| 6                        | Motivation  | Bel Cons | Belief that preeclampsia/eclampsia was not a priority health concern                | Providers           | Qualitative                  | Barriers     |
| 7                        | Motivation  | Bel Cons | Perceived over-medicalization to prescribe calcium to low risk women                | Women and Providers | Qualitative                  | Barriers     |
| 8                        | Motivation  | Bel Cons | Fears in generating anxiety on low-risk women                                       | Providers           | Qualitative                  | Barriers     |
| 9                        | Motivation  | Bel Cons | Belief that women should get a chance to receive information regardless risk        | Providers           | Qualitative                  | Facilitators |
| 10                       | Opportunity | Ev       | Providers felt that providing calcium would increase workload                       | Providers           | Qualitative                  | Barriers     |
| 11                       | Opportunity | Ev       | Inadequate number of staff providing care                                           | Providers           | Qualitative                  | Barriers     |
| 12                       | Opportunity | Ev       | Comprehensive integrated program (job aids, training, guidelines, regular supplies) | Providers           | Quantitative                 | Facilitators |

|              |              |
|--------------|--------------|
| Barriers     | Barriers     |
| Facilitators | Facilitators |

\* Know: Knowledge, Phys: Physical skills, Mem: Memory, attention and decision processes, Beh Reg: Behavioural regulation, Em: Emotion, Id: Social/professional role and identity, Bel Cons: Belief about consequences, Bel Cap: Belief about capabilities, Int: Intentions, Opt: Optimisms, Ev: Environmental context and resources, Soc: Social influences
